# Supplementary material
Source: PubMed Central journal article supplement (PMC7790436)
Supplement: NIHMS1644334-supplement-1644334_SuppTable1.pdf [file NIHMS1644334-supplement-1644334_SuppTable1.pdf]

| Subject No. | dpi   | RUL | RML | RLL | LUL | LML | LLL | Lung Gross Score |
|-------------|-------|-----|-----|-----|-----|-----|-----|------------------|
| AGM-1       | 5     | 0   | 0   | 3   | 0   | 0   | 4   | 1.750            |
| AGM-2       | 5     | 0   | 1   | 3   | 0   | 0   | 2   | 1.375            |
| AGM-3       | 5     | 0   | 0   | 1   | 1   | 2   | 3   | 1.375            |
| AGM-4       | 57/22 | 0   | 0   | 1   | 1   | 1   | 1   | 0.750            |
| AGM-5       | 57/22 | 1   | 1   | 1   | 0   | 1   | 2   | 1.125            |
| AGM-6       | 57/22 | 0   | 1   | 1   | 1   | 1   | 1   | 0.875            |
|             |       |     |     |     |     |     |     |                  |

**Table S1. Gross lung lesion severity scores in AGMs infected with SARS-CoV-2.**

Lung lesions were interpreted by a board-certified veterinary pathologist and scored according to the following criteria: 0 (0% of lobe affected), 1 (1-25% of lobe affected), 2 (26-50% of lobe affected), 3 (51-75% of lobe affected), 4 (76-100% of lobe affected).

The following formula was used to calculate the mean gross score:  $[(RUL + RML + LUL + LML) / 4 + (RLL + LLL) / 2] / 2 = \text{Gross score}$ . Abbreviations: RUL (right upper lobe); RML (right median lobe); RLL (right lower lobe); LUL (left upper lobe); LML (left median lobe); LLL (left lower lobe); dpi (days post-infection).
